# Supplementary material for: Enhancement of the sensitivity of valacyclovir and acyclovir for their spectrofluorimetric determination in human plasma
Source: Royal Society of Chemistry journal article supplement (doi:10.1039/c5ra11635j), 2015-01-01
Supplement: c5ra11635j1.pdf [file c5ra11635j1.pdf]

## Supplementary data

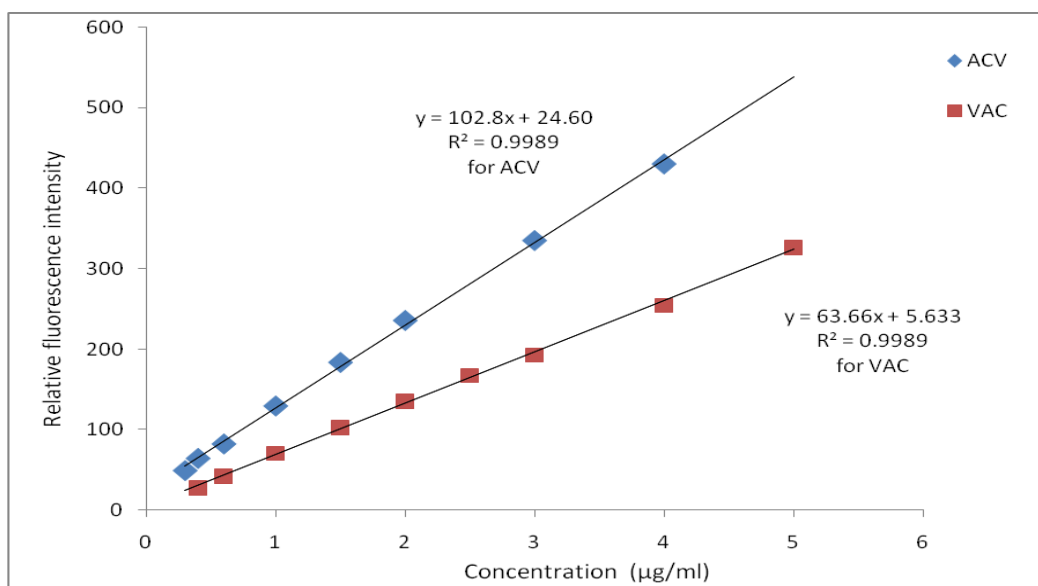

**Fig. 1(a):** Calibration curves of ACV and VAC by aqueous acid spectrofluorimetric method.

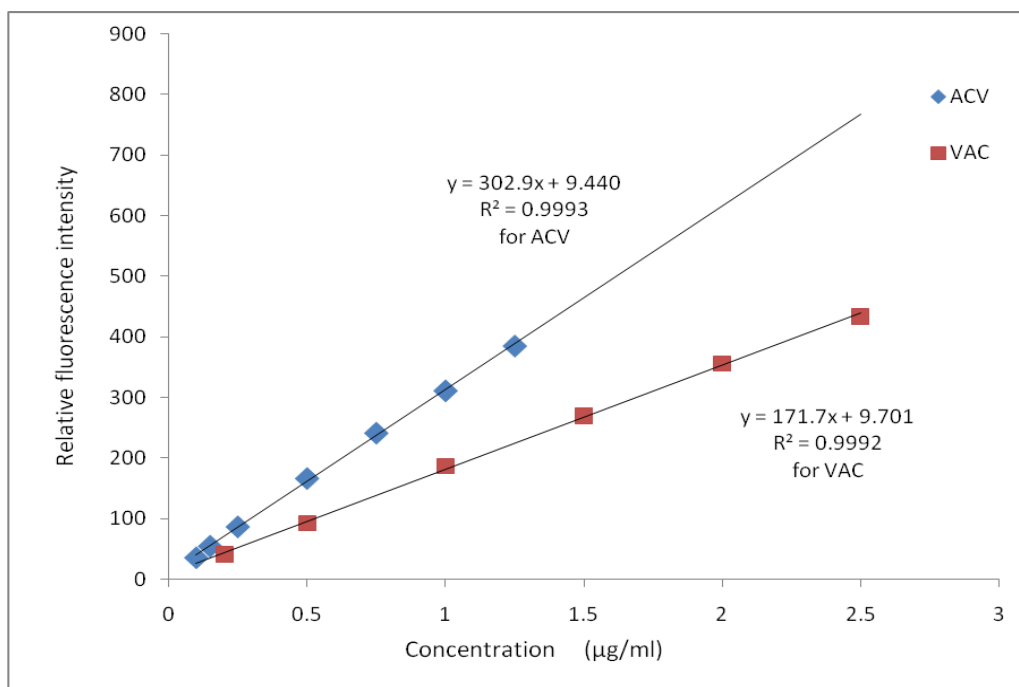

**Fig. 1(b):** Calibration curves of ACV and VAC by micelle-enhanced spectrofluorimetric method.

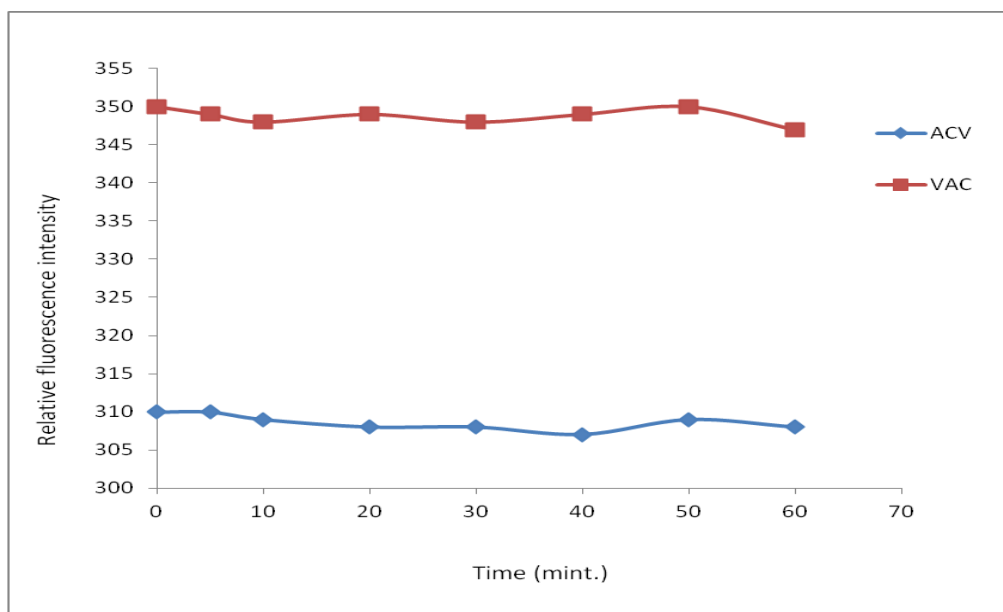

**Fig. 2:** Effect of time on the relative fluorescence intensities of ACV  $1 \mu\text{g ml}^{-1}$  and VAC is  $2 \mu\text{g ml}^{-1}$  in micellar system.

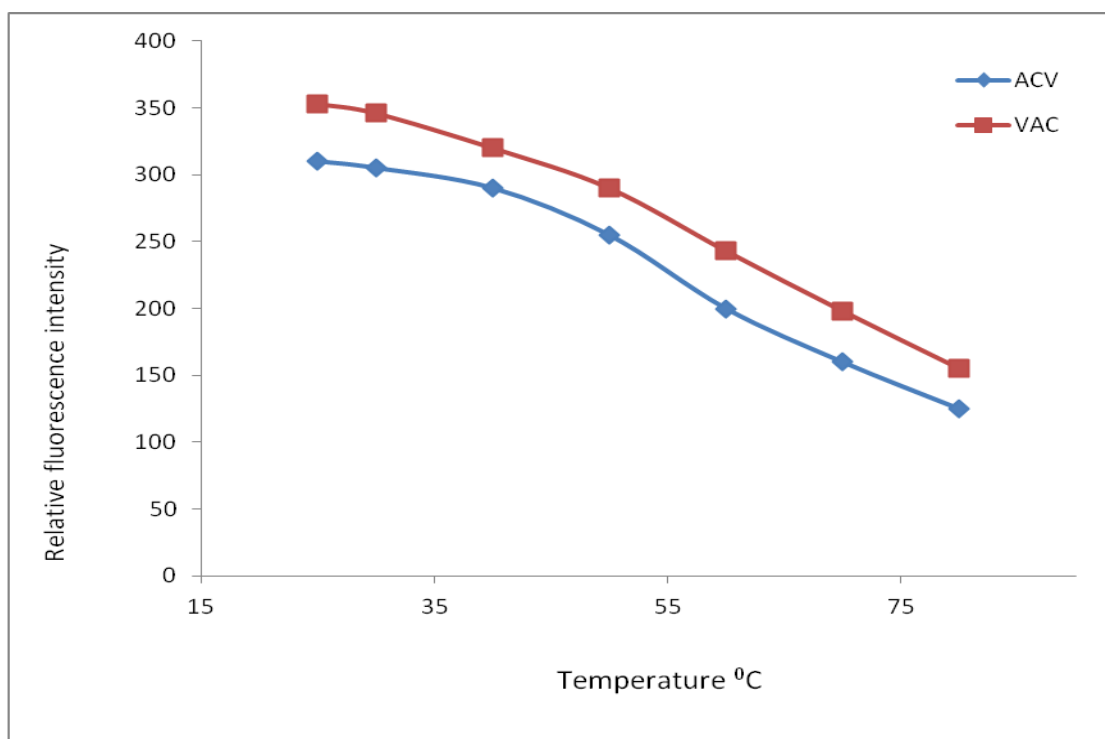

**Fig. 3.** Effect of temperature on the relative fluorescence intensities of ACV  $1 \mu\text{g ml}^{-1}$  and VAC is  $2 \mu\text{g ml}^{-1}$  in micellar system.

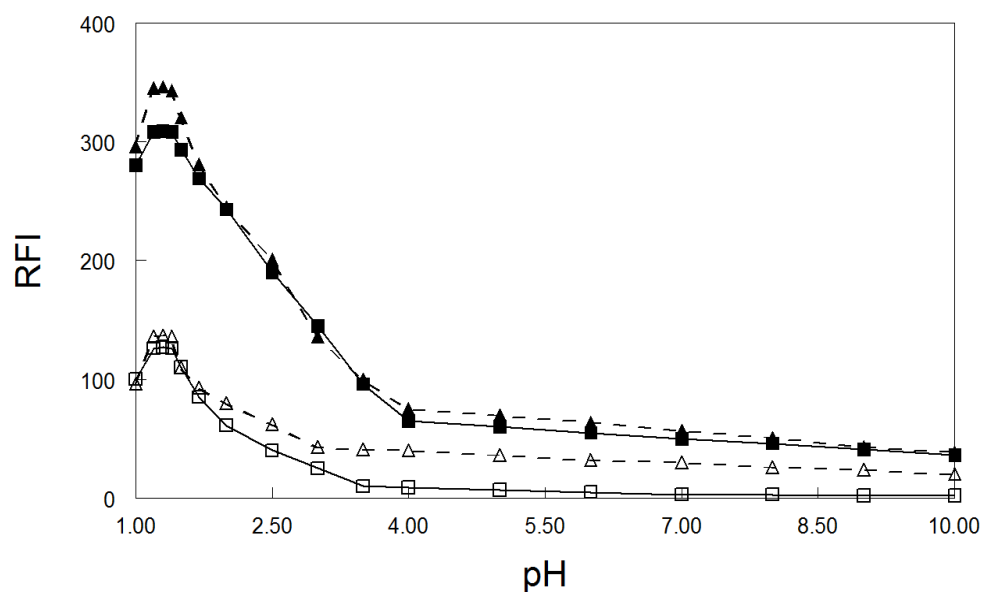

**Fig. 4:** Effect of pH on the relative fluorescence intensities of aqueous ACV (-□-), VAC (-△-), ACV in SDS system (-■-), and VAC in micellar system (-▲-). ACV concentration is  $1 \mu\text{g ml}^{-1}$  and VAC is  $2 \mu\text{g ml}^{-1}$ .

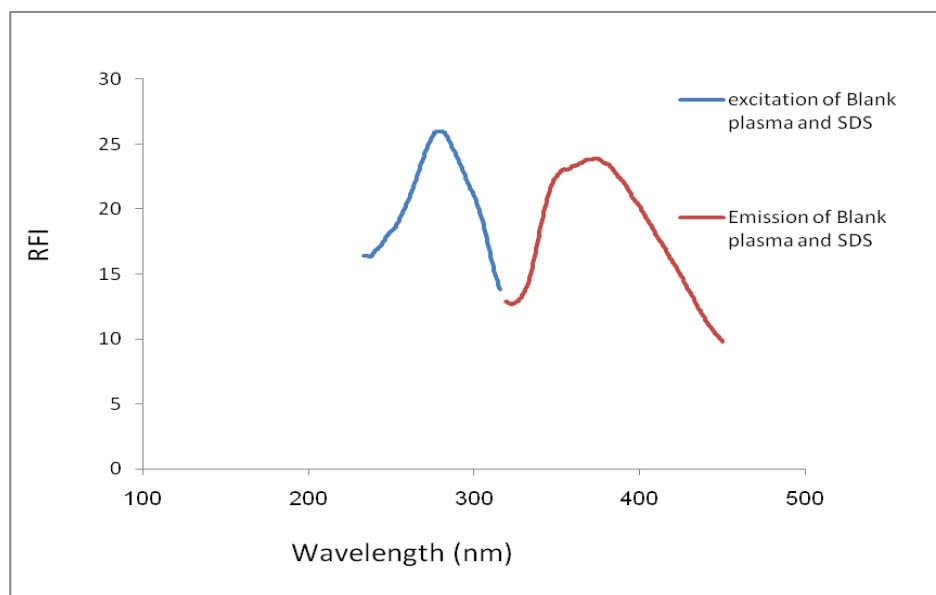

**Fig. 5.** Fluorescence spectra of drug-free human plasma treated with acetonitrile as precipitating agent and general procedure was followed with SDS.

**N. B. The same figure appears with SDS without plasma.**

**Table 1:** The Intra- and inter-day precision for the determination of VAC and ACV by the proposed spectrofluorimetric methods

| Conc.<br>( $\mu\text{g ml}^{-1}$ ) | % Recovery* $\pm$ RSD |                   |                     |                   |
|------------------------------------|-----------------------|-------------------|---------------------|-------------------|
|                                    | Intra-day precision   |                   | Inter-day precision |                   |
|                                    | Method I              | Method II         | Method I            | Method II         |
| <b>For VAC</b>                     |                       |                   |                     |                   |
| <b>1.0</b>                         | 99.12 $\pm$ 0.87      | 98.95 $\pm$ 0.39  | 99.50 $\pm$ 0.64    | 101.31 $\pm$ 2.27 |
| <b>1.5</b>                         | 99.66 $\pm$ 0.60      | 99.08 $\pm$ 0.46  | 100.6 $\pm$ 2.42    | 99.30 $\pm$ 1.08  |
| <b>2</b>                           | 98.86 $\pm$ 1.22      | 100.14 $\pm$ 1.02 | 99.77 $\pm$ 0.31    | 98.90 $\pm$ 1.52  |
| <b>For ACV</b>                     |                       |                   |                     |                   |
| <b>0.5</b>                         | 99.47 $\pm$ 0.98      | 100.75 $\pm$ 0.70 | 99.35 $\pm$ 1.42    | 103.30 $\pm$ 1.70 |
| <b>1</b>                           | 102.80 $\pm$ 0.46     | 98.91 $\pm$ 0.54  | 100.60 $\pm$ 2.13   | 99.96 $\pm$ 1.27  |
| <b>1.25</b>                        | 98.88 $\pm$ 1.01      | 97.30 $\pm$ 2.01  | 100.03 $\pm$ 0.63   | 97.60 $\pm$ 1.50  |

\*The value is the average of three determinations.

**Table 2:** Robustness for determination of VAC (2  $\mu\text{g ml}^{-1}$ ) and ACV (1  $\mu\text{g ml}^{-1}$ ) using the proposed spectrofluorimetric methods

| Method<br>parameter  | %Recovery* $\pm$ SD |                   |                  |                   |
|----------------------|---------------------|-------------------|------------------|-------------------|
|                      | VAC                 |                   | ACV              |                   |
|                      | Method I            | Method II         | Method I         | Method II         |
| <b>pH</b>            |                     |                   |                  |                   |
| 1.2                  | 100.35 $\pm$ 0.87   | 98.58 $\pm$ 0.57  | 98.70 $\pm$ 1.09 | 100.38 $\pm$ 1.68 |
| 1.4                  | 99.36 $\pm$ 0.86    | 99.53 $\pm$ 0.72  | 98.59 $\pm$ 0.98 | 98.58 $\pm$ 0.92  |
| <b>Volume of SDS</b> |                     |                   |                  |                   |
| 4 ml                 |                     | 99.41 $\pm$ 0.93  |                  | 98.10 $\pm$ 1.05  |
| 6 ml                 |                     | 100.01 $\pm$ 1.84 |                  | 99.88 $\pm$ 1.02  |

**Table 3.** Analysis of ACV in human plasma using the proposed and reported chromatographic method.

| For in vitro study         |                              |                                         |                       |                       |
|----------------------------|------------------------------|-----------------------------------------|-----------------------|-----------------------|
| Concentration<br>(ng/ml)   | % Recovery <sup>a</sup> ± SD |                                         | t- value <sup>b</sup> | F- value <sup>b</sup> |
|                            | Proposed<br>micellar method  | Reported HPLC<br>method <sup>[18]</sup> |                       |                       |
| 500                        | 98.49 ± 1.42                 | 98.58 ± 1.36                            | 0.112                 | 1.092                 |
| 700                        | 99.60 ± 1.31                 | 97.70 ± 2.03                            | 1.754                 | 2.419                 |
| 1000                       | 97.64 ± 1.45                 | 96.87 ± 1.22                            | 0.901                 | 1.409                 |
| For in vivo study          |                              |                                         |                       |                       |
| % Recovery<br>in vivo ± SD | Proposed<br>micellar method  | Reported HPLC<br>method <sup>[18]</sup> | t- value <sup>b</sup> | F- value <sup>b</sup> |
|                            | 80.02 ± 0.23                 | 79.63 ± 0.49                            | 1.639                 | 4.842                 |

<sup>a</sup> Average of five determinations.

<sup>b</sup> tabulated values at 95% confidence limit are t=2.306, F=6.338..
